# Supplementary material for: Three Active Phytotoxic Compounds from the Leaves of Albizia richardiana (Voigt.) King and Prain for the Development of Bioherbicides to Control Weeds
Source: MDPI journal article supplement (doi:10.3390/cells10092385), 2021-09-10
Supplement: s1 [file s1]

## Supporting Information:

# Three Active Phytotoxic Compounds from the Leaves of *Albizia richardiana* (Voigt.) King and Prain for the Development of Bioherbicides to Control Weeds

Kawsar Hossen <sup>1,2</sup>, Kaori Ozaki <sup>3</sup>, Toshiaki Teruya <sup>4</sup> and Hisashi Kato-Noguchi <sup>1,2,\*</sup>

<sup>1</sup> Department of Applied Biological Science, Faculty of Agriculture, Kagawa University, Miki 761-0795, Japan; kawsar.ag@nstu.edu.bd

<sup>2</sup> The United Graduate School of Agricultural Sciences, Ehime University, Matsuyama 790-8566, Japan

<sup>3</sup> Graduate School of Engineering and Science, University of the Ryukyus, 1 Senbaru, Nishihara, Okinawa 903-0213, Japan; k168239@eve.u-ryukyu.ac.jp

<sup>4</sup> Faculty of Education, University of the Ryukyus, 1 Senbaru, Nishihara, Okinawa 903-0213, Japan; t-teruya@edu.u-ryukyu.ac.jp

\* Correspondence: kato.hisashi@kagawa-u.ac.jp

| Contents                                                                                                                                                                                                 | Page Number |
|----------------------------------------------------------------------------------------------------------------------------------------------------------------------------------------------------------|-------------|
| NMR spectral data and Mass spectral data of compound 1, 2, 3 (4,5-dihydrovomifoliol, 3-Hydroxy-5 $\alpha$ ,6 $\alpha$ -epoxy- $\beta$ -ionone, and 3-(2-Hydroxyethyl)-2,4,4-trimethyl 2cyclohexen-1-one) | S2          |
| NMR spectrum of compound 1, 2 (4,5-dihydrovomifoliol, and 3-Hydroxy-5 $\alpha$ ,6 $\alpha$ -epoxy- $\beta$ -ionone)                                                                                      | S3          |
| NMR spectrum of compound 3 (3-(2-Hydroxyethyl)-2,4,4-trimethyl-2cyclohexen-1-one)                                                                                                                        | S4          |
| HRESIMS spectrum of compound 1, 2, 3 (4,5-dihydrovomifoliol, 3-Hydroxy-5 $\alpha$ ,6 $\alpha$ -epoxy- $\beta$ -ionone, and 3-(2-Hydroxyethyl)-2,4,4-trimethyl-2cyclohexen-1-one)                         | S7          |

*4,5-dihydrovomifoliol*: colorless oil;  $^1\text{H}$  NMR (500 MHz,  $\text{CD}_3\text{OD}$ ) 5.84 (1H, dd,  $J = 15.7, 5.8$  Hz, H-8), 5.66 (1H, dd,  $J = 15.7, 1.2$  Hz, H-7), 4.34, (1H, q, H-9), 2.87 (1H, d,  $J = 13.6$  Hz, H-2 ax), 2.45 (1H, dd,  $J = 14.1, 12.1$  Hz, H-4 ax), 2.31-2.22 (1H, m, H-5), 2.12 (1H, ddd,  $J = 14.1, 4.6, 2.3$  Hz, H-4 eq), 1.82 (1H, dd,  $J = 13.6, 2.3$ , H-2 eq), 1.27 (3H, d,  $J = 6.4$  Hz, H<sub>3</sub>-13), 0.98 (3H, s, H<sub>3</sub>-11), 0.92 (3H, s, H<sub>3</sub>-12), 0.90 (3H, d,  $J = 6.7$  Hz, H<sub>3</sub>-13); HRESIMS  $m/z$  249.1463 (calcd for  $\text{C}_{13}\text{H}_{22}\text{O}_3\text{Na}$ , 249.1467).

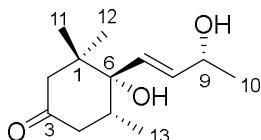

*3-Hydroxy-5 $\alpha$ ,6 $\alpha$ -epoxy- $\beta$ -ionone*; colorless oil;  $^1\text{H}$  NMR (500 MHz,  $\text{CD}_3\text{OD}$ ) 7.17 (1H, d,  $J = 15.8$  Hz, H-7), 6.18 (1H, d,  $J = 15.8$  Hz, H-8), 3.76 (1H, m, H-3), 2.30 (1H, ddd,  $J = 14.3, 5.1, 1.7$  Hz, H-4), 2.29 (3H, s, H-10), 1.66 (1H, dd,  $J = 14.3, 9.2$  Hz, H-4), 1.58 (1H, ddd,  $J = 12.9, 3.4, 1.7$  Hz, H-2), 1.27 (1H, dd,  $J = 12.9, 10.8$  Hz, H-2), 1.19 (3H, s, H-13), 1.18 (3H, s, H-12), 0.96 (3H, s, H-11); HRESIMS  $m/z$  247.1306 (calcd for  $\text{C}_{13}\text{H}_{20}\text{O}_3\text{Na}$  247.1310).

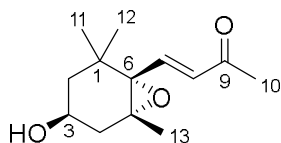

*3-(2-Hydroxyethyl)-2,4,4-trimethyl-2cyclohexen-1-one*; colorless oil;  $^1\text{H}$  NMR (500 MHz,  $\text{CDCl}_3$ ) 3.73 (2H, t,  $J = 8.0$  Hz, 8-H), 2.58 (2H, t,  $J = 8.0$  Hz, 7-H), 2.47 (2H, t,  $J = 6.6$  Hz, 3-H), 1.81 (3H, s, 9-H), 1.81 (2H, t,  $J = 6.6$  Hz, 2-H), 1.17 (6H, s, 11-H and 10-H);  $^{13}\text{C}$  NMR (125 MHz,  $\text{CDCl}_3$ ) 199.3, 160.0, 141.5, 132.5, 61.4, 37.4, 36.3, 34.4, 27.0, 12.0; HRESIMS  $m/z$  183.1385 (calcd for  $\text{C}_{11}\text{H}_{19}\text{O}_2$  183.1385).

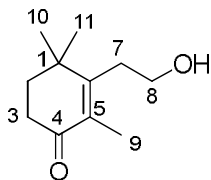

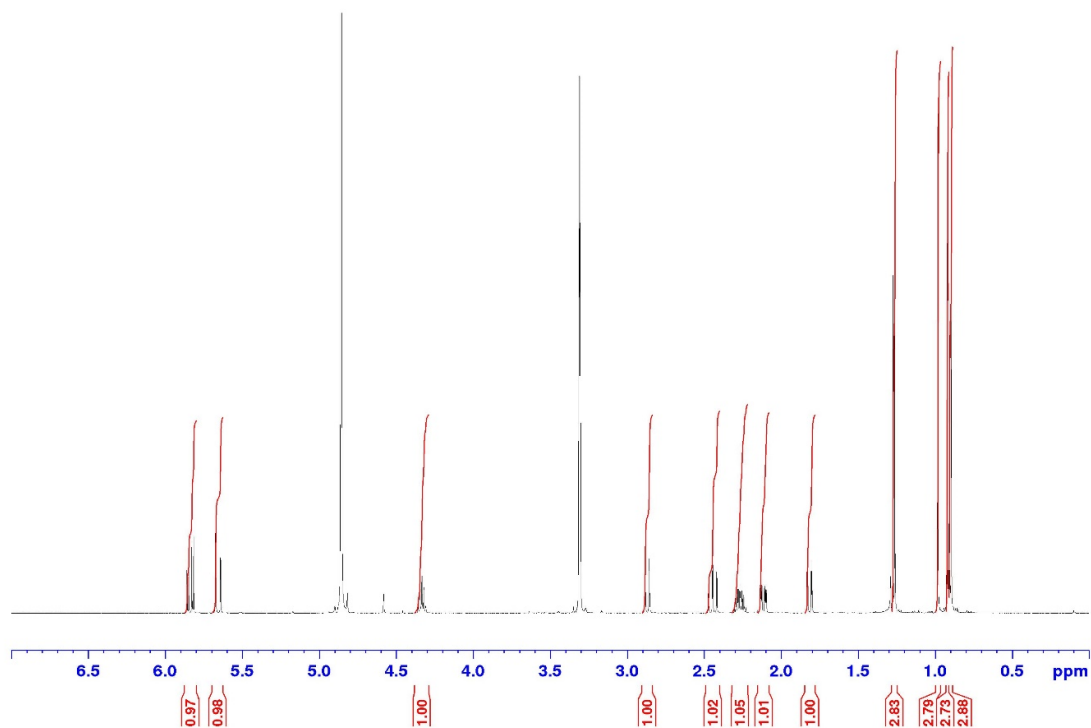

Figure S1.  $^1\text{H}$  NMR spectrum of compound 1 (4,5-dihydrovomifoliol) in  $\text{CD}_3\text{OD}$  (500 MHz).

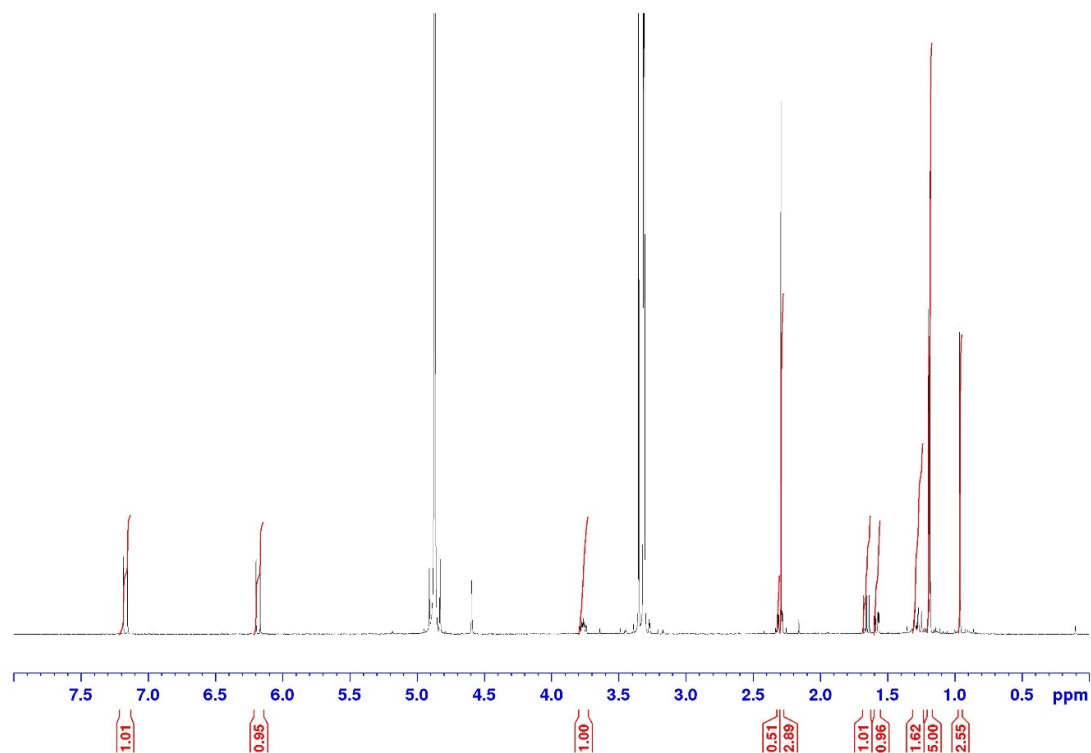

Figure S2.  $^1\text{H}$  NMR spectrum of compound 2 (3-Hydroxy-5 $\alpha$ ,6 $\alpha$ -epoxy- $\beta$ -ionone) in  $\text{CD}_3\text{OD}$  (500 MHz).

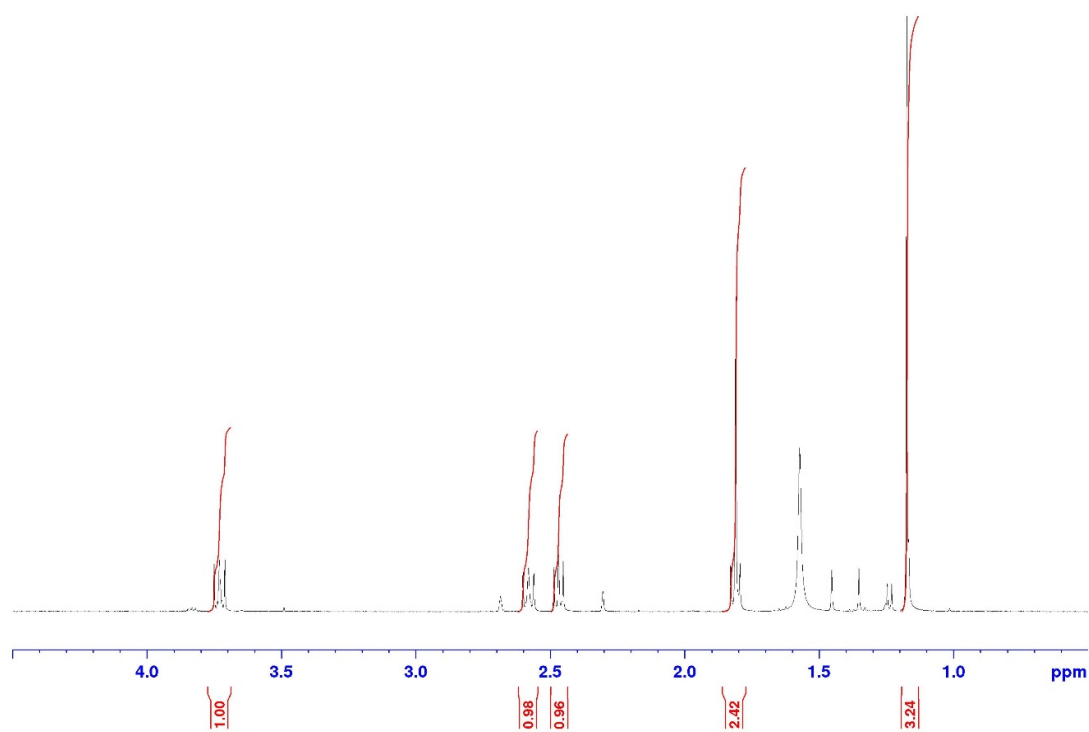

Figure S3. <sup>1</sup>H NMR spectrum of compound 3 (3-(2-Hydroxyethyl)-2,4,4-trimethyl-2cyclohexen-1-one) in CDCl<sub>3</sub> (500 MHz).

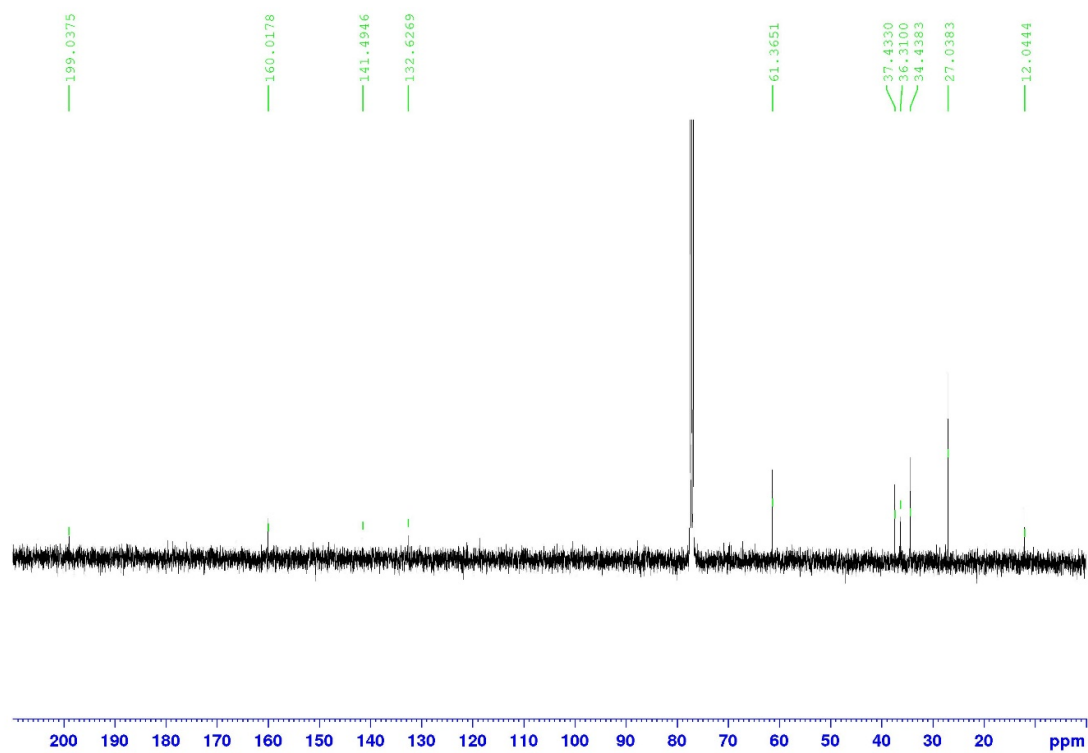

Figure S4.  $^{13}\text{C}$  NMR spectrum of compound 3 (3-(2-Hydroxyethyl)-2,4,4-trimethyl-2cyclohexen-1-one) in  $\text{CDCl}_3$  (125 MHz).

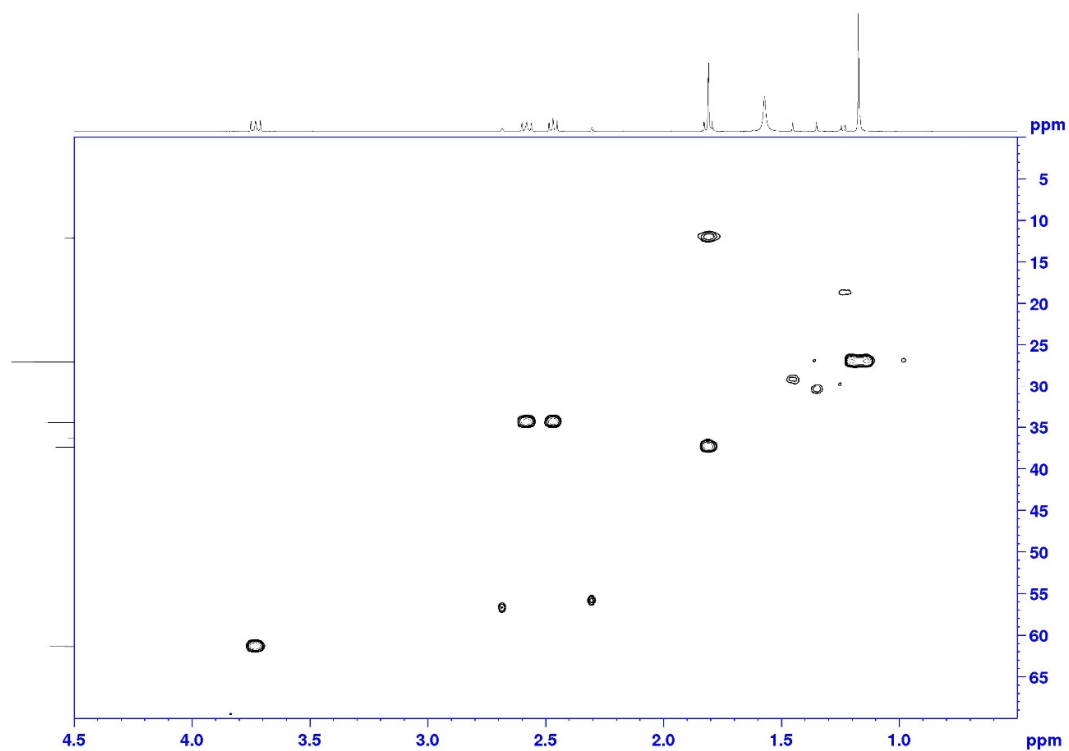

Figure S5. HSQC spectrum of compound 3 (3-(2-Hydroxyethyl)-2,4,4-trimethyl-2cyclohexen-1-one) in  $\text{CDCl}_3$  (500 MHz).

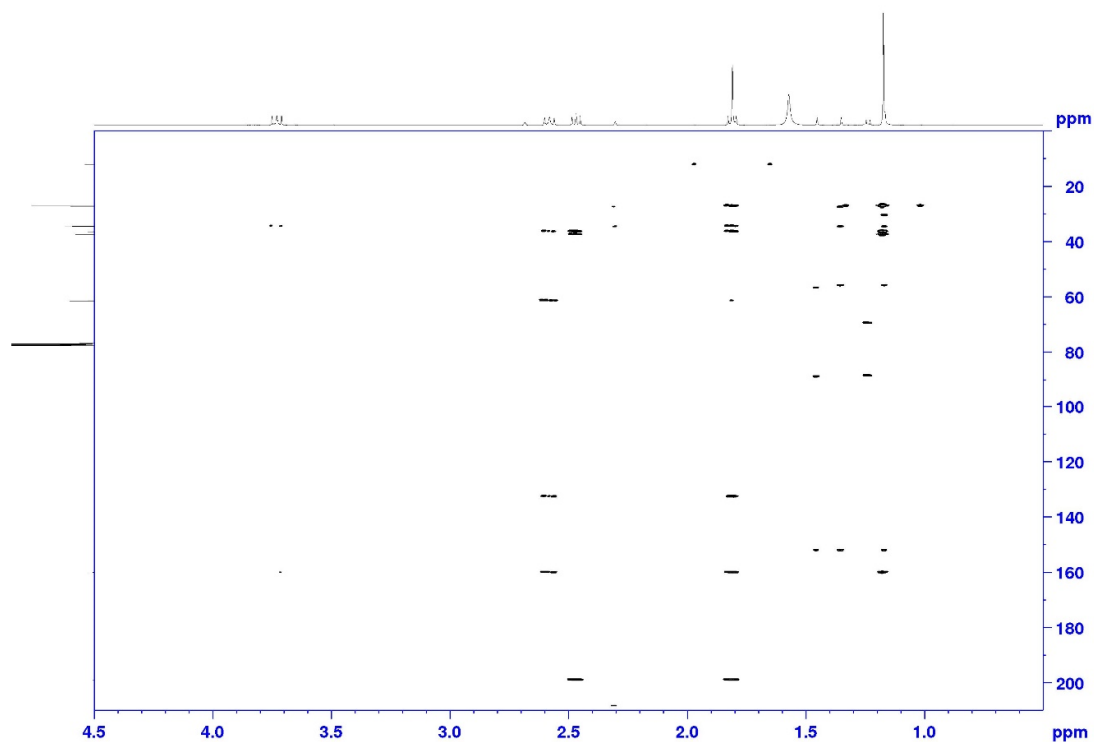

Figure S6. HMBC spectrum of compound 3 (3-(2-Hydroxyethyl)-2,4,4-trimethyl-2cyclohexen-1-one) in  $\text{CDCl}_3$  (500 MHz).

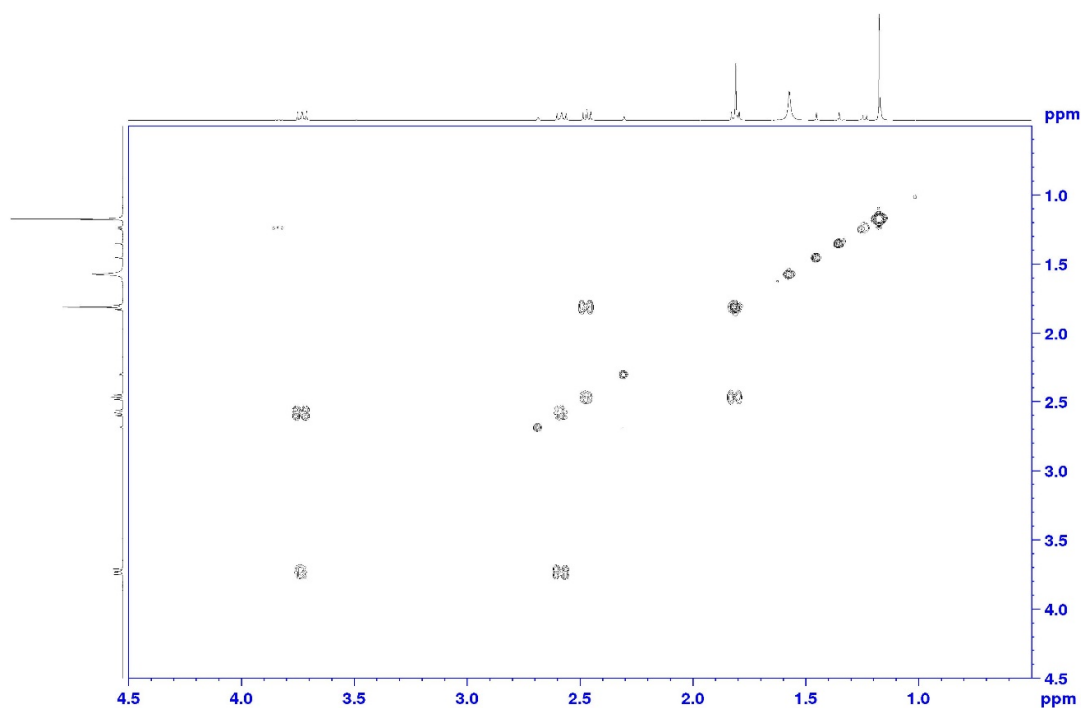

Figure S7. COSY spectrum of compound 3 (3-(2-Hydroxyethyl)-2,4,4-trimethyl-2cyclohexen-1-one) in  $\text{CDCl}_3$  (500 MHz).

OK-14-60-2  
210305\_teruya10 37 (0.232)

1: TOF MS ES+  
1.26e+003

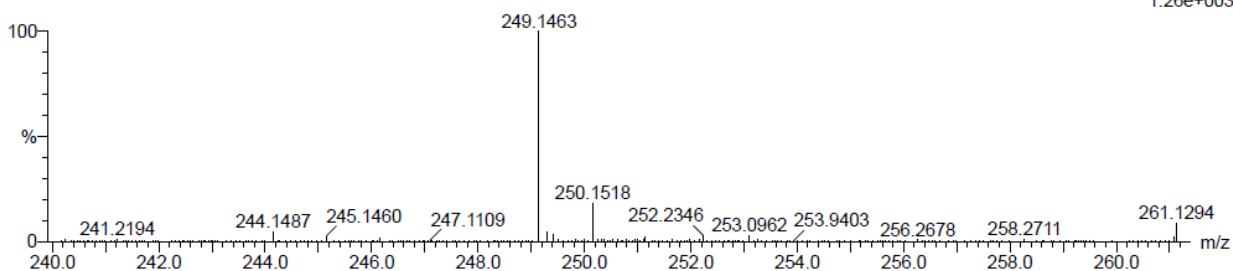

Figure S8. HRESIMS spectrum of compound 1 (4,5-dihydrovomifoliol).

OK-14-60-3  
210305\_teruya11 30 (0.195)

1: TOF MS ES+  
2.17e+003

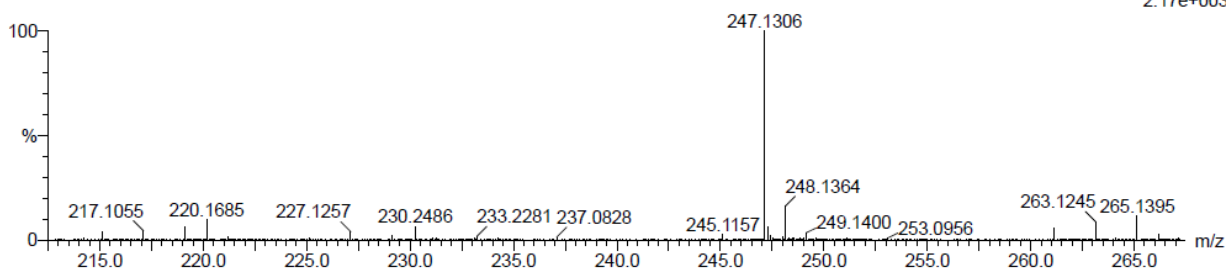

Figure S9. HRESIMS spectrum of compound 2 (3-Hydroxy-5 $\alpha$ ,6 $\alpha$ -epoxy- $\beta$ -ionone).

OK-14-68-2  
210305\_teruya12 42 (0.258)

1: TOF MS ES+  
4.73e+002

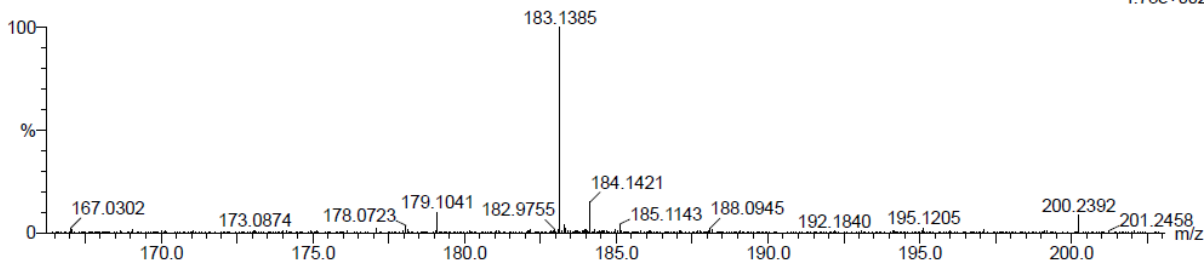

Figure S10. HRESIMS spectrum of compound 3 (3-(2-Hydroxyethyl)-2,4,4-trimethyl-2-cyclohexen-1-one).
